# Supplementary material for: Salt-inclusion sulfides [K4Cl][MII11In9S26] (MII = Zn, Cd) displaying robust nonlinear optical activity
Source: Royal Society of Chemistry journal article supplement (doi:10.1039/d3qm01130e), 2024-01-01
Supplement: d3qm01130e1.pdf [file d3qm01130e1.pdf]

## Electronic Supplementary Information

### Salt-inclusion sulfides $[K_4Cl][M^{II}_{11}In_9S_{26}]$ ( $M^{II} = Zn, Cd$ ) displaying robust nonlinear optical activity

Yang-Ping Zhang,<sup>1,2</sup> Shao-Min Pei,<sup>1</sup> Xiao-Ming Jiang,<sup>1</sup> Bin-Wen Liu,<sup>1,\*</sup> and Guo-Cong Guo<sup>1,\*</sup>

<sup>1</sup> State Key Laboratory of Structural Chemistry, Fujian Institute of Research on the Structure of Matter, Chinese Academy of Sciences, Fuzhou, Fujian 350002, P. R. China.

<sup>2</sup> School of Physical Science and Technology, Shanghai Tech University, Shanghai 201210, P. R. China.

\* Correspondence: [bwliu@fjirsm.ac.cn](mailto:bwliu@fjirsm.ac.cn), [gcguo@fjirsm.ac.cn](mailto:gcguo@fjirsm.ac.cn)

#### SURPOTING INFORMATION

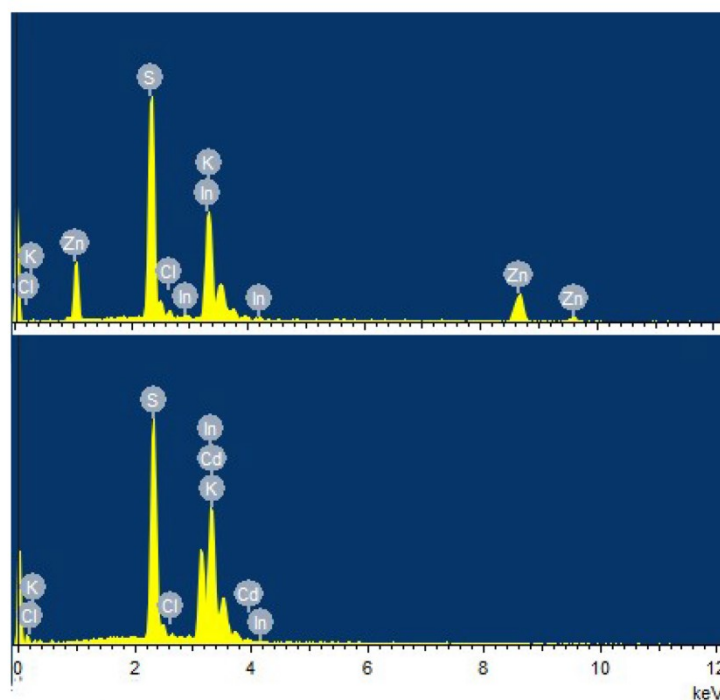

Fig. S1 The EDS results of compounds 1 and 2.

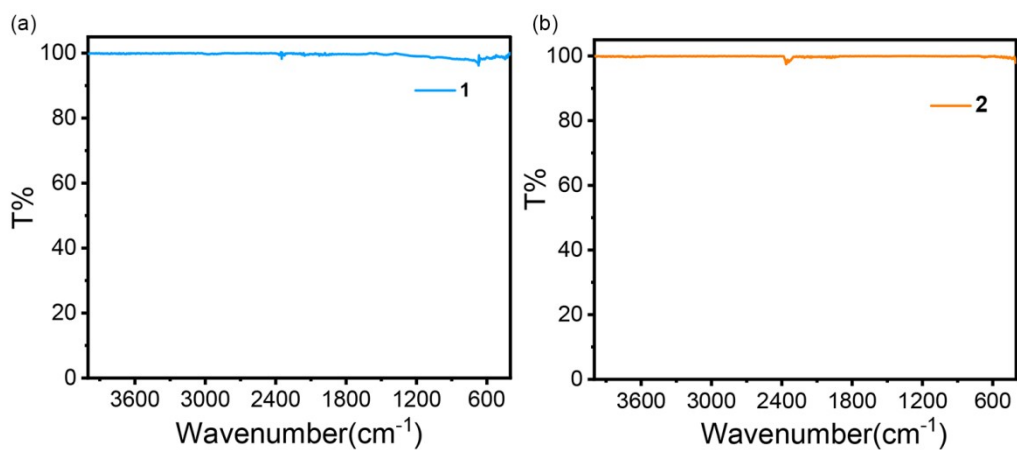

**Fig. S2** The IR results of compounds **1** and **2**.

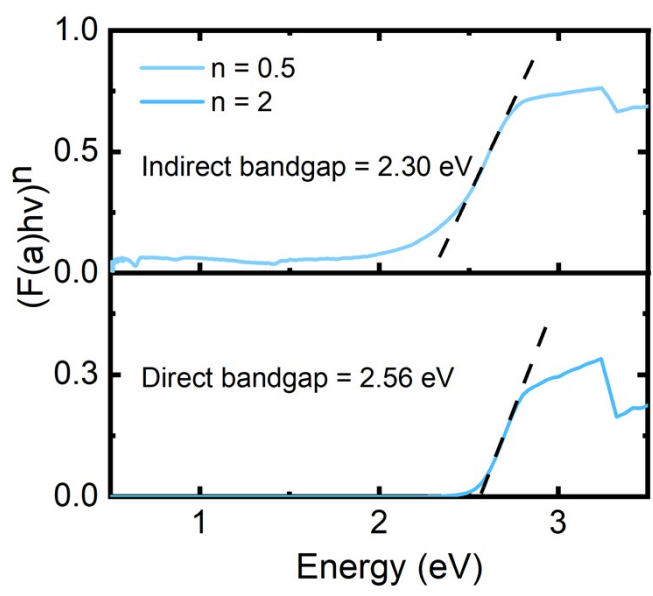

**Fig. S3** The band gaps of **2** are determined by direct and indirect models.

**Table S1.** Selected bond distances (Å) in compounds **1** and **2**.

| bond              | distance/Å | bond     | distance/Å |
|-------------------|------------|----------|------------|
| <b>compound 1</b> |            |          |            |
| K1-Cl1            | 2.930(7)   | Zn6-S4   | 2.399(3)   |
| K2-Cl1×2          | 2.932(5)   | Zn6-S8   | 2.387(3)   |
| K3-Cl1            | 2.896(8)   | Zn6-S15  | 2.389(3)   |
| Zn1-S3            | 2.411(5)   | Zn7-S2   | 2.387(4)   |
| Zn1-S4            | 2.417(3)   | Zn7-S4   | 2.352(3)   |
| Zn1-S4            | 2.417(3)   | Zn7-S5   | 2.377(3)   |
| Zn1-S9            | 2.431(5)   | Zn7-S13  | 2.412(3)   |
| Zn2-S1            | 2.400(3)   | Zn8-S6   | 2.373(3)   |
| Zn2-S6            | 2.435(4)   | Zn8-S11  | 2.366(4)   |
| Zn2-S11           | 2.374(3)   | Zn8-S13  | 2.405(3)   |
| Zn2-S14           | 2.428(3)   | Zn8-S15  | 2.364(3)   |
| Zn3-S5            | 2.434(3)   | Zn9-S10  | 2.383(3)   |
| Zn3-S7            | 2.431(3)   | Zn9-S11  | 2.343(3)   |
| Zn3-S10           | 2.445(4)   | Zn9-S12  | 2.355(3)   |
| Zn3-S15           | 2.406(3)   | Zn9-S13  | 2.426(4)   |
| Zn4-S2            | 2.414(3)   | Zn10-S7  | 2.390(3)   |
| Zn4-S3            | 2.431(3)   | Zn10-S9  | 2.360(3)   |
| Zn4-S7            | 2.434(4)   | Zn10-S12 | 2.369(4)   |
| Zn4-S12           | 2.384(3)   | Zn10-S13 | 2.400(3)   |
| Zn5-S6            | 2.420(3)   | Zn11-S1  | 2.390(3)   |
| Zn5-S6            | 2.420(3)   | Zn11-S2  | 2.403(3)   |
| Zn5-S8            | 2.419(5)   | Zn11-S5  | 2.426(4)   |
| Zn5-S14           | 2.450(5)   | Zn11-S10 | 2.400(3)   |
| Zn6-S1            | 2.375(4)   |          |            |
| <b>compound 2</b> |            |          |            |
| K1-Cl1            | 2.985(4)   | Cd6-S11  | 2.4781(19) |
| K2-Cl1×2          | 2.993(3)   | Cd6-S12  | 2.4805(18) |
| K3-Cl1            | 2.977(5)   | Cd6-S13  | 2.533(2)   |
| Cd1-S5            | 2.4723(18) | In1-S4   | 2.4794(19) |
| Cd1-S10           | 2.492(2)   | In1-S9   | 2.469(3)   |
| Cd1-S15           | 2.4635(19) | In1-S4   | 2.4795(19) |
| Cd1-S7            | 2.4784(19) | In1-S3   | 2.457(3)   |
| Cd2-S6            | 2.4686(18) | In2-S6   | 2.508(2)   |
| Cd2-S14           | 2.490(3)   | In2-S1   | 2.4865(19) |
| Cd2-S6            | 2.4686(18) | In2-S14  | 2.5127(17) |
| Cd2-S8            | 2.460(3)   | In2-S11  | 2.4684(18) |
| Cd3-S1            | 2.478(2)   | In3-S7   | 2.5219(19) |
| Cd3-S8            | 2.5197(18) | In3-S12  | 2.503(2)   |
| Cd3-S15           | 2.5134(19) | In3-S13  | 2.5285(18) |
| Cd4-S13           | 2.5364(18) | In4-S1   | 2.4920(19) |

|         |            |         |            |
|---------|------------|---------|------------|
| Cd4-S5  | 2.5200(19) | In4-S2  | 2.4892(18) |
| Cd4-S4  | 2.493(2)   | In4-S5  | 2.509(2)   |
| Cd4-S2  | 2.510(3)   | In4-S10 | 2.5054(19) |
| Cd5-S11 | 2.505(2)   | In5-S2  | 2.493(2)   |
| Cd5-S13 | 2.5352(17) | In5-S3  | 2.5208(15) |
| Cd5-S15 | 2.4931(19) | In5-S7  | 2.514(2)   |
| Cd5-S6  | 2.5180(19) | In5-S12 | 2.480(2)   |
| Cd6-S10 | 2.5217(19) |         |            |

**Table S2.** Fractional atomic coordinates ( $\times 10^4$ ) and equivalent isotropic displacement parameters ( $\text{\AA}^2 \times 10^3$ ) for A.  $U_{\text{eq}}$  is defined as 1/3 of the trace of the orthogonalised  $U_{\text{IJ}}$  tensor.

| Atom              | x          | y          | z          | U(eq)    |
|-------------------|------------|------------|------------|----------|
| <b>compound 1</b> |            |            |            |          |
| K1                | 0          | 6373(3)    | 2731(5)    | 51.6(15) |
| K2                | 3750(2)    | 3459(2)    | 2704(4)    | 51.0(11) |
| K3                | 0          | 2225(4)    | 4685(5)    | 56.9(17) |
| Zn1               | 0          | 3323.2(7)  | 775.8(16)  | 10.3(3)  |
| Zn2               | 1011.1(5)  | 556.2(5)   | 3215.6(12) | 13.6(2)  |
| Zn3               | 2957.7(5)  | 1649.1(5)  | 689.8(9)   | 15.4(2)  |
| Zn4               | 1028.4(5)  | 3927.3(5)  | 3196.9(12) | 14.6(2)  |
| Zn5               | 0          | 36.7(8)    | 679.5(15)  | 10.6(3)  |
| Zn6               | 980.2(5)   | 1690.9(5)  | 796.9(13)  | 18.3(3)  |
| Zn7               | 1984.2(6)  | 3308.0(7)  | 686.2(14)  | 17.7(3)  |
| Zn8               | 1964.6(5)  | 19.3(7)    | 715.5(14)  | 13.4(3)  |
| Zn9               | 2963.9(5)  | 545.6(5)   | 3144.0(15) | 18.8(3)  |
| Zn10              | 991.0(5)   | 4991.6(7)  | 690.7(14)  | 15.5(2)  |
| Zn11              | 2005.2(5)  | 2213.5(5)  | 3213.7(12) | 17.5(2)  |
| S1                | 940.2(17)  | 1705.2(15) | 2680(3)    | 17.4(7)  |
| S2                | 2046.3(17) | 3344.6(14) | 2576(3)    | 15.4(7)  |
| S3                | 0          | 3303(2)    | 2688(4)    | 15.9(9)  |
| S4                | 4005.7(15) | 2221.9(15) | 4994(3)    | 14.7(7)  |
| S5                | 3044.2(16) | 2811.7(15) | 136(3)     | 13.1(7)  |
| S6                | 995.7(14)  | 616.9(17)  | 5145(3)    | 14.0(7)  |
| S7                | 4035.3(16) | 1130.9(16) | 123(3)     | 13.6(6)  |
| S8                | 0          | 1166(2)    | -4(4)      | 15.7(9)  |
| S9                | 0          | 4442(2)    | 24(4)      | 14.8(9)  |
| S10               | 3053.9(16) | 1687.1(14) | 2623(3)    | 14.7(7)  |
| S11               | 3015.0(15) | 4947.8(15) | 2589(3)    | 16.0(7)  |
| S12               | 4005.5(14) | 50.5(16)   | 2568(3)    | 15.3(7)  |
| S13               | 2022.9(14) | 4448.5(14) | 68(3)      | 13.0(7)  |
| S14               | 0          | 60(2)      | 7617(4)    | 15.7(9)  |
| S15               | 1933.8(16) | 1113.3(15) | 9(3)       | 16.7(7)  |

|                   |            |            |            |          |
|-------------------|------------|------------|------------|----------|
| C11               | 0          | 2241(2)    | 6982(5)    | 29.5(10) |
| In1               | 0          | 3323.2(7)  | 775.8(16)  | 10.3(3)  |
| In2               | 1011.1(5)  | 556.2(5)   | 3215.6(12) | 13.6(2)  |
| In3               | 2957.7(5)  | 1649.1(5)  | 689.8(9)   | 15.4(2)  |
| In4               | 1028.4(5)  | 3927.3(5)  | 3196.9(12) | 14.6(2)  |
| In5               | 0          | 36.7(8)    | 679.5(15)  | 10.6(3)  |
| In6               | 980.2(5)   | 1690.9(5)  | 796.9(13)  | 18.3(3)  |
| In7               | 1984.2(6)  | 3308.0(7)  | 686.2(14)  | 17.7(3)  |
| In8               | 1964.6(5)  | 19.3(7)    | 715.5(14)  | 13.4(3)  |
| In9               | 2963.9(5)  | 545.6(5)   | 3144.0(15) | 18.8(3)  |
| In10              | 991.0(5)   | 4991.6(7)  | 690.7(14)  | 15.5(2)  |
| In11              | 2005.2(5)  | 2213.5(5)  | 3213.7(12) | 17.5(2)  |
| <b>compound 2</b> |            |            |            |          |
| K1                | 0          | 3596.8(15) | 3069.0(3)  | 66.6(10) |
| K2                | 1254.3(13) | 1555.0(12) | 3117.0(2)  | 66.4(7)  |
| K3                | 0          | 2251.2(16) | 6070.0(3)  | 64.6(11) |
| Cd1               | 2974.1(2)  | 1667.1(2)  | 101.1(5)   | 15.7(1)  |
| Cd2               | 0          | 15.1(4)    | 80.6(8)    | 15.9(2)  |
| Cd3               | 4031.7(2)  | 3309.5(2)  | 4980.6(6)  | 18.7(1)  |
| Cd4               | 1978.1(3)  | 3294.2(2)  | 76.6(6)    | 20.6(2)  |
| Cd5               | 1940.0(2)  | 37.8(3)    | 70.2(7)    | 20.0(1)  |
| Cd6               | 2032.2(2)  | 4466.3(2)  | 2654.1(7)  | 19.1(1)  |
| In1               | 0          | 3327.2(3)  | 0000.0(8)  | 17.3(2)  |
| In2               | 4008.6(2)  | 4438.7(2)  | 2540.7(6)  | 19.6(1)  |
| In3               | 4027.9(2)  | 6.9(3)     | 85.4(6)    | 20.5(1)  |
| In4               | 3006.0(2)  | 2781.0(2)  | 2549.9(6)  | 20.1(1)  |
| In5               | 3981.2(2)  | 1089.5(2)  | 2562.2(6)  | 19.7(1)  |
| S1                | 4083.4(9)  | 3287.0(8)  | 3075.4(18) | 19.4(4)  |
| S2                | 2941.7(10) | 1640.4(8)  | 3151.8(18) | 19.6(4)  |
| S3                | 0          | 6718.1(12) | 3110.0(2)  | 18.2(6)  |
| S4                | 9623.0(9)  | 2779.7(8)  | 827.5(19)  | 19.2(4)  |
| S5                | 3078.8(9)  | 2811.9(8)  | 622.8(16)  | 17.9(4)  |
| S6                | 963.9(8)   | 649.4(9)   | 5616.2(17) | 17.4(4)  |
| S7                | 4049.2(9)  | 1175.9(9)  | 634.9(17)  | 18.2(4)  |
| S8                | 0          | 1112.3(11) | 811.0(2)   | 20.4(6)  |
| S9                | 0          | 4403.7(11) | 820.0(2)   | 16.7(5)  |
| S10               | 1951.7(9)  | 3296.9(8)  | 3187.7(17) | 20.1(4)  |
| S11               | 1953.9(8)  | 79.2(9)    | 3150.9(17) | 20.2(4)  |
| S12               | 948.1(8)   | 4952.9(9)  | 3160.7(16) | 16.7(4)  |
| S13               | 2024.9(8)  | 4454.2(8)  | 704.5(16)  | 15.2(4)  |
| S14               | 0          | 71.2(13)   | 3169.0(2)  | 19.0(6)  |
| S15               | 1960.9(9)  | 1152.3(8)  | 799.5(18)  | 19.6(4)  |
| C11               | 0          | 2224.4(12) | 3779.0(3)  | 33.0(6)  |
